# Supplementary material
Source: PubMed Central journal article supplement (PMC4450083)
Supplement: NIHMS661840-supplement-supplement_1.pdf [file NIHMS661840-supplement-supplement_1.pdf]

474 **Figure 4.** Immunoblot analysis of SDS solubilised total bacterial protein probed with  
475 monoclonal anti-multiple banded antigen antibody. Of 26 individual transformation  
476 experiments only one strain (U6) showed altered mobility of the MBA following transposon  
477 mutagenesis (+Tn). Representative gel of several experiments is shown showing 3 strains of  
478 serovar (SV) 3 and 2 strains of serovar 6.

479 **Figure 5.** Growth kinetics for *U. parvum* parent strain (HPA5) compared to membrane  
480 protein disruption (UU390::mTn) or DEADbox RNA-helicase gene disruption (UU582::mTn)  
481 when incubated at 37°C (A.), 33°C (B.), or 25°C (C.). Strains were titrated out in a 10-fold  
482 dilution series and growth measured at time points indicated by urease conversion of urea to  
483 ammonium ions. *Ureaplasma* growth is shown as colour (pH indicator) changing units per  
484 ml. Mean and standard deviation of dilutions performed in triplicate. Results were consistent  
485 through three repeated experiments.

486 **Figure 6.** Serum killing (A) and immunoblot analysis using human high titre seropositive  
487 serum (B) for parental *U. urealyticum* strain W11 and following successful transposon  
488 mutagenesis (+Tn). Serum killing of increases significantly following 1 h challenge with  
489 human serum containing anti-*Ureaplasma* antibodies and analysis of this serum shows the  
490 serum-sensitive transposon mutated strain has lost a 41 kDa band that was immunoreactive  
491 with the challenging serum. Bar graph shows mean +/- SEM of experiments performed in  
492 triplicate. Representative immunoblot from three repeat experiments shown.

493

494 **Supplementary Figure 1.** Further PCR mapping of successful transposon-mutagenised  
495 strains of *Ureaplasma parvum* and W11 (*Ureaplasma urealyticum*) using the methods outlined  
496 for Figure 1. Presence of the gentamicin resistance gene (primers 1518F to 1898R) was only  
497 found in transposon mutated strains. PCR probing identified one of three DFK1 serovar 1  
498 strains (three different experiments) and HPA78 to have some of the transposase (Tnase) gene  
499 integrated into the genome.. Expected amplicon size is indicated to the right of the figure.

500 **Supplementary Figure 2.** PCR amplification of *U. parvum* genes (as designated by ATCC  
501 strain 700970 nomenclature) UU390, UU450, UU520, and UU582 using primers designed  
502 within the coding region of these genes. An additional primer set amplifying the end of gene  
503 UU187 and the beginning of UU188 (including the 31 bp promoter region) was also included.  
504 Non-mutagenised HPA5 and U6 serovar 3 *U. parvum* are included as controls. Single clones  
505 with disrupted genes are shown for each primer set as well as 7 additional clones successfully  
506 transformed with the mini-transposon to show specificity.

507 **Supplementary figure 3:** Growth of HPA5 in triplicate at 25, 33, and 37°C as measured by  
508 colour change of *Ureaplasma* selective medium from Mycoplasma Experience Ltd. 180 µl  
509 were placed in each well and 20 µl of prototype laboratory *U. parvum* strain HPA5  
510 was inoculated into the first well (in triplicate). Filter tips were changed between each  
511 dilution (transfer of 20 µl) across the plate. The plates were then incubated in separate  
512 incubators at the listed temperatures and the growth documented at various time points.  
513 These images were taken at the 48 hr time point for one of the repeats of the experiment.

514 **Supplementary Figure 4.** Sequence and detail of the pMT85 vector.

515

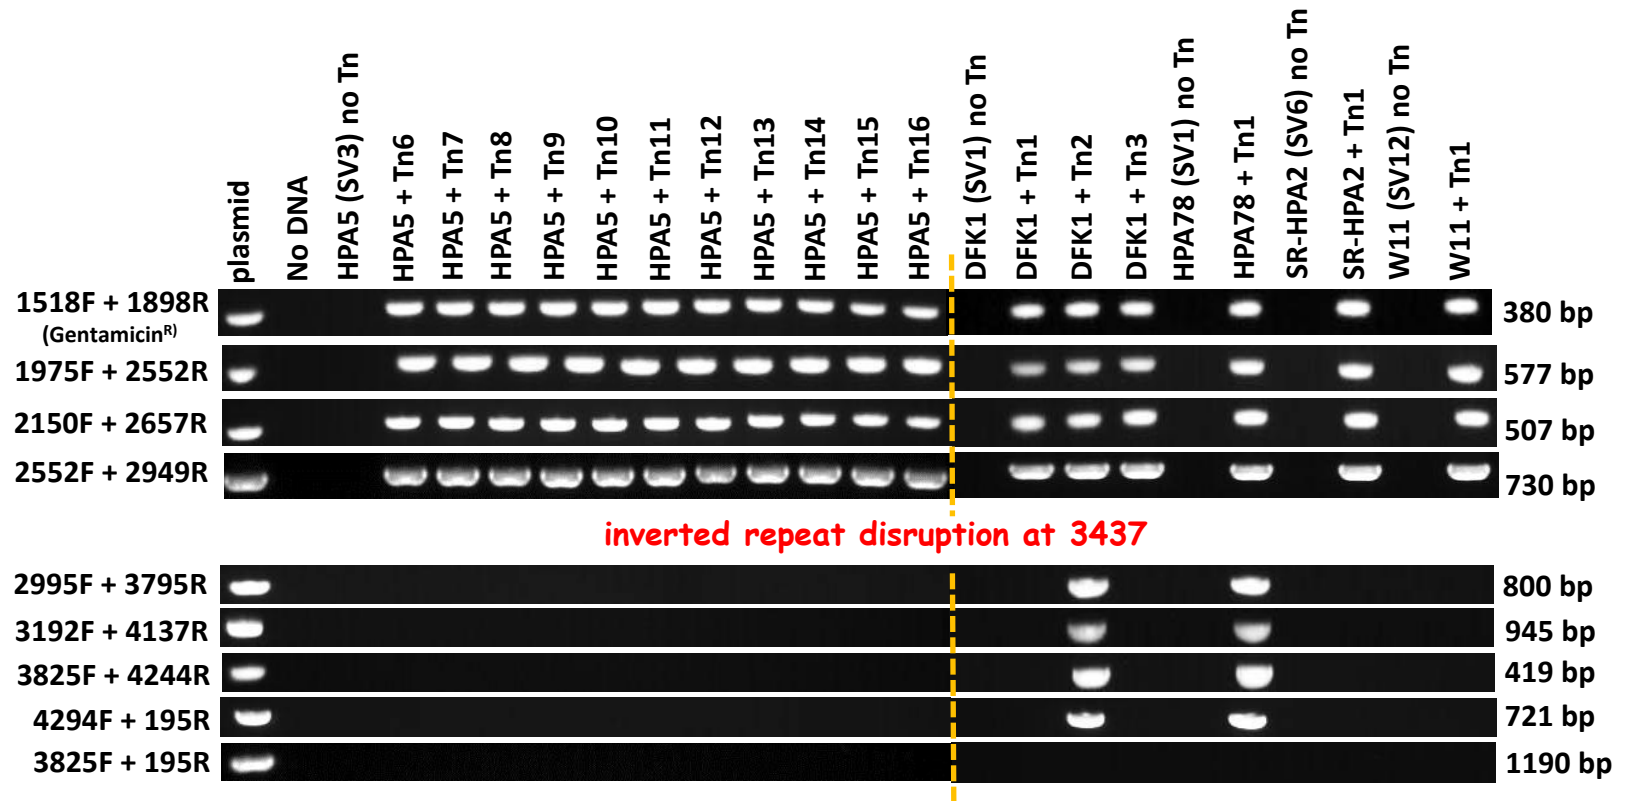

**Supplementary Figure 1.** Further PCR mapping of successful transposon-mutagenised strains of *Ureaplasma parvum* and W11 (*Ureaplasma urealyticum*) using the methods outlined for Figure 1. Presence of the gentamicin resistance gene (primers 1518F to 1898R) was only found in transposon mutated strains. PCR probing identified one of three DFK1 serovar 1 strains (three different experiments) and HPA78 to have some of the transposase (Tnase) gene integrated into the genome.. Expected amplicon size is indicated to the right of the figure.

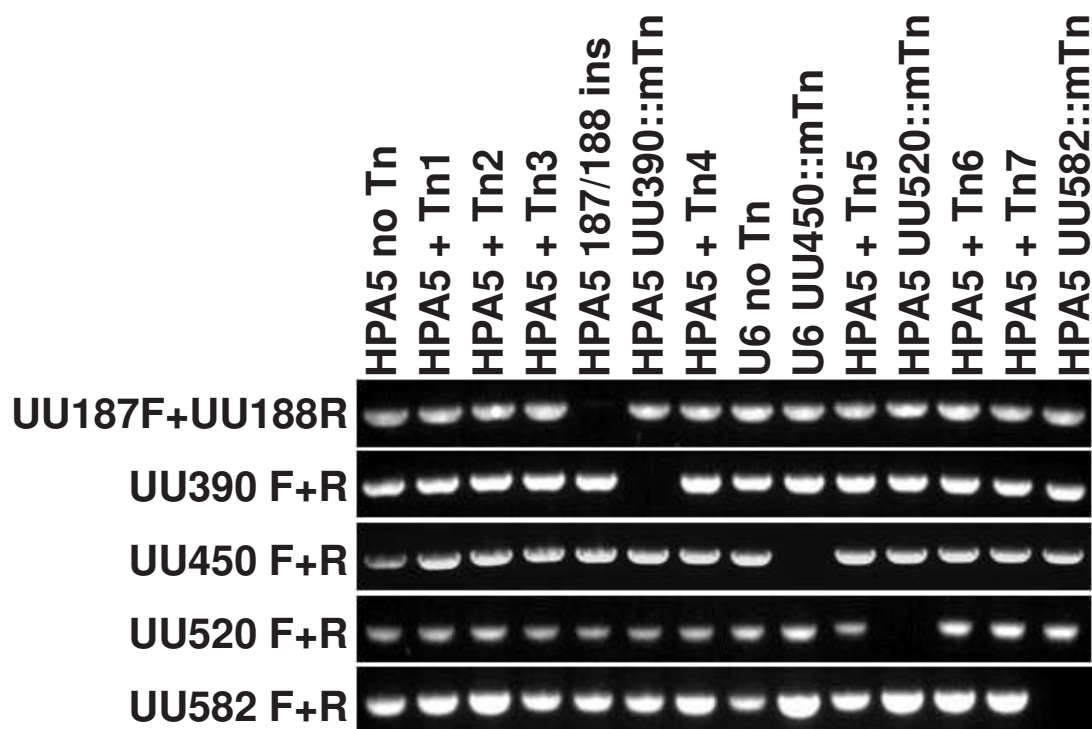

**Supplementary Figure 2.** PCR amplification of *U. parvum* genes (as designated by ATCC strain 700970, nomenclature) UU390, UU450, UU520, and UU582 using primers designed within the coding region of these genes. An additional primer set amplifying the end of gene UU187 and the beginning of UU188 (including the 32 bp intragenic region) was also included. Non-mutagenised HPA5 and U6 serovar 3 *U. parvum* are included as controls. Single clones with disrupted genes are shown for each primer set as well as 7 additional clones successfully transformed with the mini-transposon to show specificity.

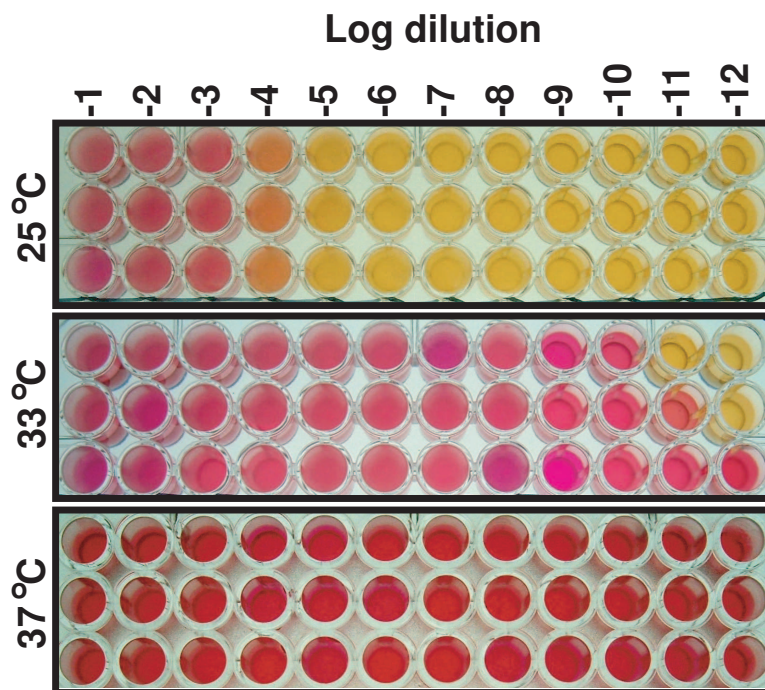

**Supplementary figure 3:** Growth of HPA5 in triplicate at 25, 33, and 37°C as measured by colour change of Ureaplasma selective medium from Mycoplasma Experience Ltd. 180  $\mu$ l were placed in each well and 20  $\mu$ l of prototype laboratory U. parvum strain HPA5 was inoculated into the first well (in triplicate). Filter tips were changed between each dilution (transfer of 20  $\mu$ l) across the plate. The plates were then incubated in separate incubators at the listed temperatures and the growth documented at various time points. These images were taken at the 48 hr time point for one of the repeats of the experiment.

**Supplementary Figure 4.** Sequence and detail of the pMT85 vector

Legend:

**Inverted repeat 1** : 1-26

**Inverted repeat 2**: 3412-3438

**Gentamicin resistance**: 1036 - 2475 479 a.a.

bifunctional AAC/APH (AAC(6'): 6'-aminoglycoside N-acetyltransferase and APH(2''): 2''-aminoglycoside phosphotransferase [synthetic *Mycoplasma genitalium* JCVI-1.0]

Sequence ID: [gi|166079093|gb|ABY79711.1](#)|Length: 495 (100% match)

**transposase** 3538-4710 390 a.a.

IS256, transposase [*Enterococcus faecalis* V583]

Sequence ID: [gi|29374776|ref|NP\\_813928.1](#)|Length: 390 (100% match)

>pMT85gen

**GATAAAGTCCGTATAATTGTGTAAAA**ACCCATAGCTTTGGACACACACTAGTACGGA  
TCCACCCGCAATTACTGTGAGTTAGCTCACTCATTAGGCACCCCAGGCTTTACACTT  
TATACTTCCGGCTCGTATATTGTGTGGAATTGTGAGCGGATAACAATTTACACACAGG  
AAACAGCTATGACCTTGATTACGGAATTCACGGCCGGGGGGCCACCCCACCAATTG  
ACGCGGCCGCAACTCTAGAGGATTCATCGGCCGTCGTTGCCTGGTTTCCGGCACCAG  
AAGCGGTGCCGAAAGCTGGCTGGAGTGCGATCTTCTGAGGCCGATACTGTCGTCG  
TCCCCTCAAACCTGGCAGATGCACGGTTACGATGCGCCCATCTACACCAACGTGACCT  
ATCCCATACGGTCAATCCGCCGTTTGTTCACGAGAAATCCGACGGGTTGTTACT  
GCGCTCACATTTATATGCTGACTGAAAGCTGGCTACAGGAAGGCCAGACGCGAATTA  
TTTTTGATGGCTAGAAGCTTTAGGATGAATGGATTTATTCTTCAAGAAAATACATCA  
ATTTTGATAAGTAGAAATGGTAAAAACATTGTATAGCATTTTACACAGGAGTCTGGA  
CTTGACTGAGTTTATGGAAGAAGTTTTAATTGATGATAATATGGTTTTTTGATATTGA  
TAATTTAAAAGGATTTCTTAATGATACCAGTTC AATTTGGGTTTATAGCTAAAGAAA  
ATAATAAAATTATAGGATTTGCATATTGCTATACACTTTTAAGACCTGATGGAAAAA  
CAATGTTTTATTTACACTCAATAGGAATGTTACCTAACTATCAAGACAAAGGTTATG  
GTTCAAATTTATTTATCTTTTTATTAAGGAATATTCTAAAGAGATTGTTTGTCTGAAA  
TGTTTTTAATAACTGATAAAGGTAATCCTAGAGCTTGCCATGTATATGAAAAATTAG  
GTGGTAAAAATGATTATAAAGATGAAATAGTATATGTATATGATTATGAAAAAGGTA  
GATAAATAAATGAATATAGTTGAAAAATGAAATATGTATAAGAACTTTAATAGATGAT  
GATTTTCTTTTGATGTTAAAATGGTAACTGATGAAAGAGTATTAGAATTTTATGGT  
GGTAGAGATAAAAAATATACATTAGAATCATTA AAAAAACATTATACAGAGCCTTG  
GAAGATGAAGTTTTTTAGAGTAATTATTGAATATAACAATGTTCTTATTGGATATGGA  
CAAATATATAAAATGTATGATGAGTTATATACTGATTATCATTATCCAAAACTGAT  
GAGATAGTCTATGGTATGGATCAATTTATAGGAGAGCCAAATTTATGGAGTAAAGGA  
ATTGGTACAAGATATA TAAATTTGATTTTTGAATTTTTGAAAAAGAAAGAAATGCT  
AATGCAGTTATTTTAGACCCTCATAAAAAATAATCCAAGAGCAATAAGGGCATAACCA  
AAATCTGGTTTTTAGAATTTATTGAAGATTTGCCAGAACATGAATTACACGAGGGCAA  
AAAGAAGATTGTTATTTAATGGAATATAGATATGATGATAATGCCACAAATGTTAAG  
GCAATGAAATATTTAATTGAGCATTACTTTGATAATTTCAAAGTAGATAGTATTGAA  
ATAATCGGTAGTGGTTATGATAGTGTGGCATAATTTAGTTAATAATGAATACATTTTT  
AAAACAAAATTTAGTACTAATAAGAAAAAAGGTTATGCAAAAAGAAAAAGCAATATAT  
AATTTTTTAAATACAAATTTAGAACTAATGTAAAAATTCCTAATATTGAATATTCG  
TATATTAGTGATGAATTATCTATACTAGGTTATAAAGAAATTAAGGAACTTTTTTA  
ACACCAGAAATTTATTCTACTATGTCAGAAGAAGACAAAATTTGTTAAAACGAGAT
